# Supplementary material for: Bile Acid Sequestration via Colesevelam Reduces Bile Acid Hydrophobicity and Improves Liver Pathology in Cyp2c70−/− Mice with a Human-like Bile Acid Composition
Source: MDPI journal article supplement (doi:10.3390/biomedicines11092495), 2023-09-08

**Supplementary Figure 1. Colesevelam does not impact the expression of genes involved in thermogenesis in brown adipose tissue of WTD fed-WT and *Cyp2c70*<sup>-/-</sup> mice.**

mRNA levels of genes involved in thermogenesis in brown adipose tissue (BAT) in *Cyp2c70*<sup>-/-</sup> mice and WT littermates on control diet and after 3 weeks of Colesevelam treatment. N = 8-9 mice/group. Data are presented as Tukey's box-and-whisker plots. BAT: brown adipose tissue; *Ucp1*: mitochondrial uncoupling protein 1; *Dio2*: iodothyronine deiodinase 2.

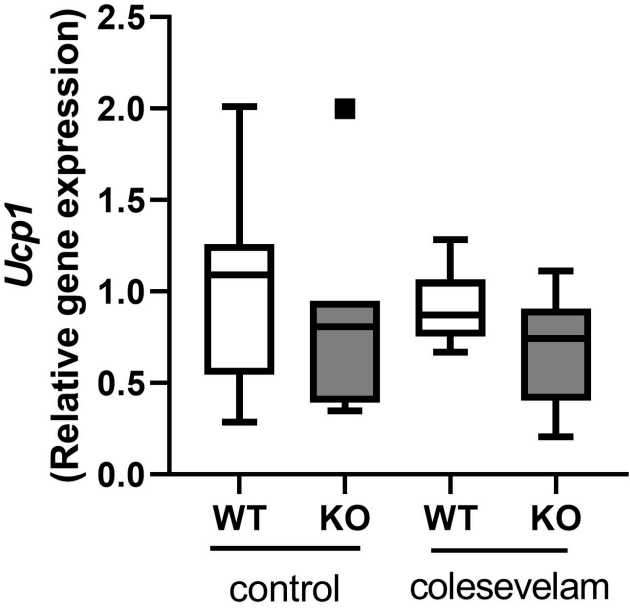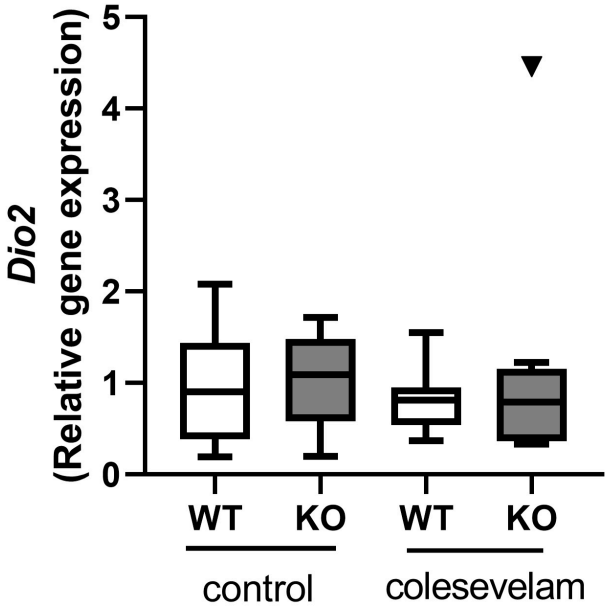

Supplement: s1 [file s1]
